# Supplementary material for: MicroRNA-154-5p suppresses cervical carcinoma growth and metastasis by silencing Cullin2 in vitro and in vivo
Source: PeerJ. 2023 Jun 27;11:e15641. doi: 10.7717/peerj.15641 (PMC10312157; doi:10.7717/peerj.15641)
Supplement: Supplemental Information 1 [file peerj-11-15641-s001.xlsx]

## Sheet: Figure 1
Figure.1A				Figure.1C
group	HaCaT	SiHa		group	Lv-Control	Lv-miR-154-5p-OE	Lv-miR-154-5p-Sp
1	14.529	14.08		1	1.37582	24.921	0.643178
2	14.666	14.067		2	0.770192	38.9699	0.530818
3	14.579	13.899		3	0.853989	33.621	0.637408
4	16.579	14.818		4	0.950626	0.713977	0.0489669
5	16.611	14.818		5	0.925914	0.362725	0.0576694
6	16.937	14.818		6	1.12346	2.3982	0.0571521
7	15.838	9.753		7	1.28346	31.6918	0.556725
8	15.596	9.791		8	0.66898	32.47	0.594618
9	15.137	9.512		9	1.04756	35.5317	1.04902
P	0.004			P		0.0001	0.9909

## Sheet: Figure 2
Figure.2A
	Lv-Control				Lv-miR-154-5p-OE			P		Lv-miR-154-5p-Sp			P
0h	1.1	1.04	0.89	0h	0.9	0.97	1.08		0h	1.4	1.75	1.96
24h	4.67	4.33	4.33	24h	1.66	1.58	1.58	0.003	24h	7.43	8.28	7.35	0.011
48h	7.37	7.79	7.54	48h	3.6	3	3.36	0	48h	8.84	8.53	9.47	0.003
72h	18.54	18.77	17.34	72h	3.17	3.6	3.72	0	72h	26.15	26.25	27.63	0
96h	24.91	22.77	26.7217	96h	8.14	7.36	7.17	0	96h	31.96	30.7	30.81	0.001
Figure.2B
group	Lv-Control	Lv-miR-154-5p-OE	Lv-miR-154-5p-Sp
1	100	35	159
2	103	32	167
3	85	36	172
P		0	0
Figure.2C
group	Lv-Control			Lv-miR-154-5p-OE			Lv-miR-154-5p-Sp
phase	G1	S	G2	G1	S	G2	G1	S	G2
1	64.53	20.88	14.35	70.02	15.64	14.08	57.26	29.52	13.2
2	65.84	19.97	13.92	71.9	15.86	12.01	55.65	30.76	13.54
3	65.49	19.49	14.74	68.98	18.04	12.78	53.83	33.02	12.1
4	67	18.21	14.49	66.55	17.74	14.58	53.64	33.79	12.55
5	66.95	18.95	13.84	68.89	16.93	13.27	56.99	30.48	12.49
6	64.04	19.98	15.75	67.7	17.65	13.78	59.05	27.12	13.57
P				0.005	0.013		0	0
Figure.2D
group	Lv-Control			Lv-miR-154-5p-OE			Lv-miR-154-5p-Sp
1	1.12691			0.334525			1.93365
2	1.01182			0.420974			1.87397
3	0.858175			0.479383			2.12941
P				0.001			0

## Sheet: Figure 5
Fig.5B				Figure.5C
group	HaCaT	SiHa		group	Lv-Control	Lv-miR-154-5p-OE	Lv-miR-154-5p-Sp
1	0.888406	1.64371		1	1.10517	0.502872	1.20352
2	1.06385	2.08632		2	0.98778	0.619966	0.92227
3	1.04775	1.70522		3	0.907055	0.301298	1.00296
P	0.006			4	0.926945	0.720243	1.20352
				5	1.15633	0.653635	0.92227
				6	0.916722	0.621384	1.00296
				7	0.912603	0.603347	1.08302
				8	1.08527	0.660239	1.13923
				9	1.00212	0.649796	1.03531
				P		0	0.4785

## Sheet: Figure 6
Figure.6A
Days	Lv-Control						Lv-miR-154-5p-OE						Lv-miR-154-5p-Sp
0	0	0	0	0	0	0	0	0	0	0	0	0	0	0	0	0	0	0
7	36.2839	58.2541	41.0062	89.7353	57.8636	48.4227	14.2644	3.04572	23.3919	0	0	18.8847	87.8984	117.25	53.6033	75.8918	70.1568	26.8155
11	67.375	55.6224	66.7316	32.321	61.9923	60.4652	12.8005	12.0649	8.37623	0	0	23.8992	50.3596	38.6856	45.0086	60.4118	76.9854	38.4975
15	102.14	73.077	84.2416	45.269	93.1662	64.6203	45.6589	29.5045	18.3431	0	0	19.5803	73.3434	39.1165	48.7836	64.0645	74.4598	38.949
19	124.904	114.562	89.6636	132.258	157.464	102.629	48.5087	12.7493	0	0	0	27.6255	57.2088	52.0645	79.5185	88.959	131.136	55.4511
23	121.487	112.283	131.888	67.598	125.85	112.641	23.5143	8.89056	11.2804	0	0	34.7785	75.6017	68.3978	47.3906	94.0012	143.158	59.2474
27	199.16	142.606	129.543	65.3858	179.893	148.759	18.5452	7.00925	9.6185	0	0	37.3527	121.44	86.1391	70.1568	111.36	175.582	83.1096
31	227.998	197.867	152.031	74.4862	232.608	184.525	25.9387	16.2	8.98614	0	0	36.475	179.381	142.741	103.822	120.483	252.677	115.856
35	311.54	255.69	237.5	105.397	319.342	198.488	30.1209	16.65	6.61862	0	0	41.9362	334.75	152.621	118.051	222.601	354.739	146.092
39	415.538	268.965	343.507	122.028	285.012	247.54	31.6819	10.8458	22.053	0	0	81.4472	654.574	204.586	192.64	225.389	457.463	174.519
42	328.071	348.194	359.322	164.708	518.035	276.668	57.0558	54.0483	18.1447	13.3111	0	59.3657	916.058	297.998	198.489	305.004	517.653	251.119
46	504.143	366.002	465.674	144.012	502.288	379.145	73.6925	76.1707	15.4721	4.8069	32.4891	97.6941	1047.56	350.573	224.096	348.46	548.998	280.22
49	539.322	656.371	525.898	204.714	499.909	370.086	89.2693	46.611	52.5171	24.2425	55.6512	115.76	1058.13	400.549	285.951	407.831	751.991	453.088
P						0.0059							0.9761
Figure.6B
group	Lv-Control	Lv-miR-154-5p-OE	Lv-miR-154-5p-Sp
1	0.4983	0.0625	0.8266
2	0.4574	0.0392	0.2362
3	0.4937	0.0337	0.3915
4	0.5473	0.0535	0.4344
5	0.1805	0.0255	0.5318
6	0.2438	0.0311	0.4416
P		0.0011	0.5907
Figure.6C
group	Lv-Control	Lv-miR-154-5p-OE	Lv-miR-154-5p-Sp
1	0.854409	1.71713	0.719118
2	1.04826	2.53854	0.760647
3	1.09733	2.08782	0.528985
4	1.64752	2.01391
5	0.55567	2.29262
6	0.796806	2.07772
Figure.6D
group	Lv-Control	Lv-miR-154-5p-OE	Lv-miR-154-5p-Sp
1	1.64752	0.668339	1.20854
2	0.55567	0.708899	1.14732
3	0.796806	0.667413	0.93062
4	1.00532	0.32616
5	0.99423	0.305375
6	1.00045	0.323683
7	1.05264	0.748625
8	0.976041	0.792957
9	0.971317	0.791858
P		0.0043	0.7939
Figure.6E
group	Lv-Control	Lv-miR-154-5p-OE	Lv-miR-154-5p-Sp
1	0.76	0.65	1.91
2	1.27	0.6	1.59
3	1.05	0.57	2.51
P		0.046	0.0336
Figure.6F
group	Lv-Control	Lv-miR-154-5p-OE	Lv-miR-154-5p-Sp
1	742.86	90.38	2012.5
2	1037.98	263.87	3624.55
3	677.14	93.98	691.36
4	398.99	181.36	3130.34
5	399.85	277.69	2075.6
P		0.0058	0.0132

## Sheet: Figure 7
Figure.7B
	Blank			Lv-Control			Lv-miR-154-5p-OE-1	Lv-miR-154-5p-OE-2	Lv-miR-154-5p-OE-3	Lv-miR-154-5p-OE-4	Lv-miR-154-5p-Sp-1	Lv-miR-154-5p-Sp-2	Lv-miR-154-5p-Sp-3	Lv-miR-154-5p-Sp-4
Liver	4660000	9521000	7088500	49340000	76070000	62705000	69700000	53700000	57400000	67000000	57200000	72900000	92400000	56400000
Spleen	2950000	4123000	3534000	7920000	8566000	8243000	6670000	10600000	5410000	3760000	11200000	6990000	7540000	6530000
Lung	4430000	4410000	4420500	15720000	19490000	17605000	15000000	13000000	20500000	10800000	18000000	14600000	16900000	22900000
Kidney	4560000	12480000	8518000	32810000	38260000	35535000	29000000	27800000	40500000	46000000	40400000	38200000	71500000	36500000
Uterus	9920000	7958000	8937000	35390000	48590000	41990000	35700000	33300000	39300000	36900000	52900000	41700000	47500000	36800000

## Sheet: Figure 8
Figure.8B
group	Lv-CUL2-CO	Lv-CUL2-OE
1	0.935023	7.2354
2	1.19257	5.57539
3	0.872407	5.90147
4	1.09199	3.48937
5	0.569183	2.13312
6	1.33882	2.28939
P		0.01
	Figure.8C
group	Lv-CUL2-CO	Lv-CUL2-OE
1	0.952542	3.02705
2	1.09377	1.72315
3	0.977148	3.47634
P		0.03
Figure.8D
Time	Lv-CUL2-CO					Lv-CUL2-OE							P
0h	0.651685	0.966292	1.16854	1.37079	0.966292	0.876404	1.73034	2.13483	2.35955	1.95506	2.1573	2.11236
24h	1.57303	1.70787	1.66292	1.68539	1.25843	0.404494	3.82022	3.70787	3.64045	3.4382	3.07865	3.48315
48h	4.78652	4.80899	5.32584	5.16854	4.92135	4.31461	10.4944	9.66292	10.1798	8.8764	9.23596	7.79775	0
72h	6.88889	7.55556	6.84444	7.91111	6.2	6.6	13.2	14.3111	13.3556	12.1556	14.6889	13.7556	0
96h	6.42697	6.5618	7.07865	7.37079	6.47191	6.06742	12.4719	12.6966	12.6966	12.382	11.7528	12.5843	0
Figure.8E
group	Lv-CUL2-CO	Lv-CU2-OE
1	389	893
2	304	844
3	394	805
P		0
Figure.8F
group	Lv-CUL2-CO			Lv-CUL2-OE
phase	G1	S	G2	G1	S	G2
1	63.16	28.29	8.13	56.44	32.63	10.77
2	63	28.71	7.86	55.99	32.47	11.29
3	62.55	28.49	8.56	57.11	31.5	11.19
P				0	0.001
Figure.8G
group	Lv-CUL2-CO			Lv-CUL2-OE
1	0.746416			2.06859
2	1.62965			2.45721
3	0.565791			2.60667
P				0.019
Figure.8H
group	CUL2-CO	CUL2-OE
1	0.0041	0.0056
2	0.0055	0.0056
3	0.0027	0.009
