# Supplementary material for: MicroRNA-154-5p suppresses cervical carcinoma growth and metastasis by silencing Cullin2 in vitro and in vivo
Source: PeerJ. 2023 Jun 27;11:e15641. doi: 10.7717/peerj.15641 (PMC10312157; doi:10.7717/peerj.15641)
Supplement: Supplemental Information 2 — CCK-8 assay [file peerj-11-15641-s002.xlsx]

## Sheet: Sheet1
2023.4.10	0h			minus Blank (-0.18)
group		CUL2-CO	CUL2-OE		CUL2-CO	CUL2-OE		CUL2-CO	CUL2-OE
1		0.516	0.499		0.336	0.319		1.05	0.996875
2		0.476	0.503		0.296	0.323		0.925	1.00937			0.887322
3		0.507	0.496		0.327	0.316		1.02188	0.9875
4		0.503	0.489		0.323	0.309		1.00937	0.965625
5		0.488	0.483		0.308	0.303		0.9625	0.946875
6		0.486	0.5		0.306	0.32		0.95625	1
2023.4.11	24h			mean	0.316
group		CUL2-CO	CUL2-OE		CUL2-CO	CUL2-OE		CUL2-CO	CUL2-OE
1		0.757	0.914		0.577	0.734		1.80313	2.29375			-8.83203e-08
2		0.791	0.887		0.611	0.707		1.90938	2.20938
3		0.78	0.903		0.6	0.723		1.875	2.25937
4		0.795	0.897		0.615	0.717		1.92188	2.24063
5		0.762	0.875		0.582	0.695		1.81875	2.17188
6		0.789	0.905		0.609	0.725		1.90312	2.26562
2023.4.12	48h			mean
group		CUL2-CO	CUL2-OE		CUL2-CO	CUL2-OE		CUL2-CO	CUL2-OE
1		1.032	1.214		0.852	1.034		2.6625	3.23125			6.18062e-07
2		1.021	1.271		0.841	1.091		2.62812	3.40937
3		0.978	1.246		0.798	1.066		2.49375	3.33125
4		1.014	1.234		0.834	1.054		2.60625	3.29375
5		0.912	1.259		0.732	1.079		2.2875	3.37188
6		0.914	1.293		0.734	1.113		2.29375	3.47812
2023.4.13	72h
group		CUL2-CO	CUL2-OE		CUL2-CO	CUL2-OE		CUL2-CO	CUL2-OE
1		1.342	1.77		1.162	1.59		3.63125	4.96875			1.74579e-10
2		1.372	1.762		1.192	1.582		3.725	4.94375
3		1.409	1.77		1.229	1.59		3.84063	4.96875
4		1.3	1.761		1.12	1.581		3.5	4.94062
5		1.317	1.76		1.137	1.58		3.55313	4.9375
6		1.353	1.759		1.173	1.579		3.66562	4.93438
2023.4.14	96h
group		CUL2-CO	CUL2-OE		CUL2-CO	CUL2-OE		CUL2-CO	CUL2-OE
1		2.133	2.887		1.953	2.707		6.10313	8.45937			5.93588e-09
2		2.06	2.98		1.88	2.8		5.875	8.75
3		2.072	3.074		1.892	2.894		5.9125	9.04375
4		1.943	2.961		1.763	2.781		5.50938	8.69063
5		1.987	2.872		1.807	2.692		5.64687	8.4125
6		1.834	2.974		1.654	2.794		5.16875	8.73125
