# Supplementary figures and images for: MicroRNA-154-5p suppresses cervical carcinoma growth and metastasis by silencing Cullin2 in vitro and in vivo
Source: PeerJ journal article supplement (doi:10.7717/peerj.15641), 2023-06-27

Figure.6E_ raw western blot


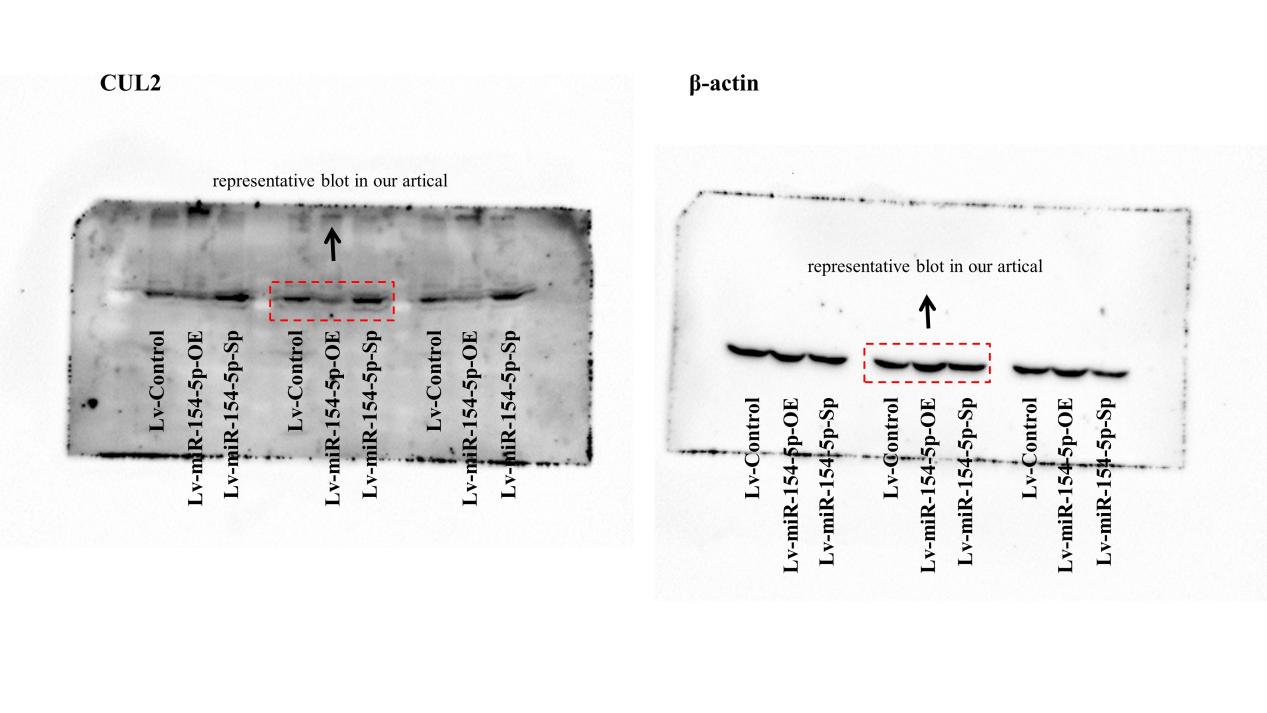


Figure.8C_ raw western blot


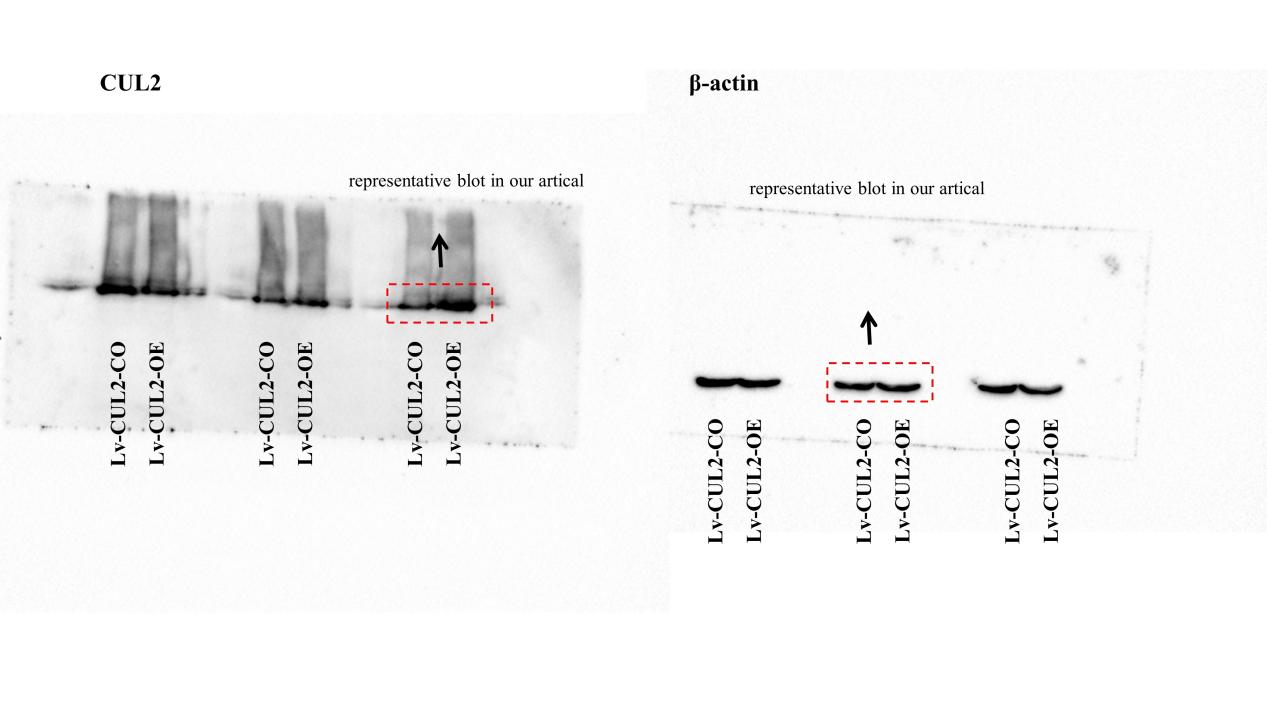

Supplement: Uncropped_Blots.zip [file Uncropped_Blots.zip]
